# Supplementary material for: Titanium dioxide nanoparticle impact and translocation through ex vivo, in vivo and in vitro gut epithelia
Source: PubMed Central journal article supplement (PMC3987106; doi:10.1186/1743-8977-11-13), 2014-03-25
Supplement: 1743-8977-11-13-S6.pdf [file 1743-8977-11-13-S6.pdf]

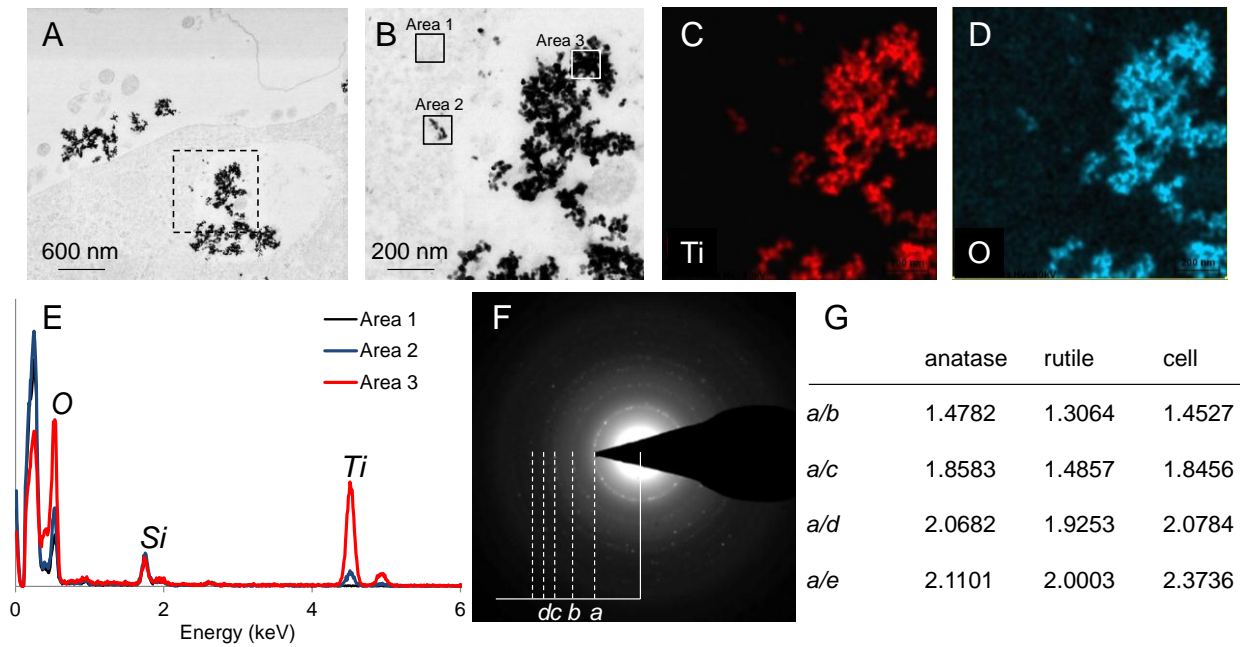

Transmission electron microscopic (TEM) observation, energy dispersive spectroscopy (EDS) and electron diffraction analyses of M-cells exposed to  $\text{TiO}_2$ -NPs. TEM image of a M-cell where  $\text{TiO}_2$ -NPs have been internalized and are stored in a cytoplasmic compartment (A), higher magnification image of the area defined in A (B). EDS imaging of Ti (C, red) and O (D, blue) distribution in B. EDS spectra recorded on the area 1, 2 and 3 as defined in B. Electron diffraction analysis of the area 3 defined in B (F) and analysis of this diffractogram by calculation of  $a/b$ ,  $a/c$ ,  $a/d$  and  $a/e$  inverse distance ratios (1/nm) and comparison with the diffraction lines of anatase and rutile references (G).
